# Supplementary material for: Lipid Composition of Latex and Rubber Particles in Hevea brasiliensis and Taraxacum kok-saghyz
Source: MDPI journal article supplement (doi:10.3390/molecules25215110), 2020-11-03
Supplement: s1 [file s1]

## Electronic Supplementary Information

### Lipid composition of fresh latex and rubber particles in *Hevea brasiliensis* and *Taraxacum kok-saghyz*

Sung Woo Bae <sup>1,2,3,†</sup>, Sunghee Jung <sup>1,2,†</sup>, Sang Chul Choi <sup>1</sup>, Mi Young Kim <sup>1</sup>, and Stephen Beungtae Ryu <sup>1,2,#</sup>

<sup>1</sup> Plant Systems Engineering Research Center, Korea Research Institute of Bioscience & Biotechnology (KRIBB), Daejeon 34141, South Korea

<sup>2</sup> Department of Biosystems and Bioengineering, KRIBB School of Biotechnology, University of Science and Technology (UST), Daejeon 34141, South Korea

<sup>3</sup> Research & Development Center, JICO Ltd., Daejeon 341486, South Korea

# Correspondence to: sbryu@kribb.re.kr; Tel.: +82-42-860-4295 (S.B.R.)

† These authors contributed equally to this work

**Figure S1:** HPLC-ELSD chromatogram of phospholipid standards.

**Table S1:** Classes and proportions of phosphatidic acids in each sample (mol %).

**Table S2:** Classes and proportions of phosphatidylglycerols in each sample (mol %).

**Table S3:** Classes and proportions of phosphatidylserines in each sample (mol %).

**Table S4:** Classes and proportions of lysophosphatidylcholines in each sample (mol %).

(a)

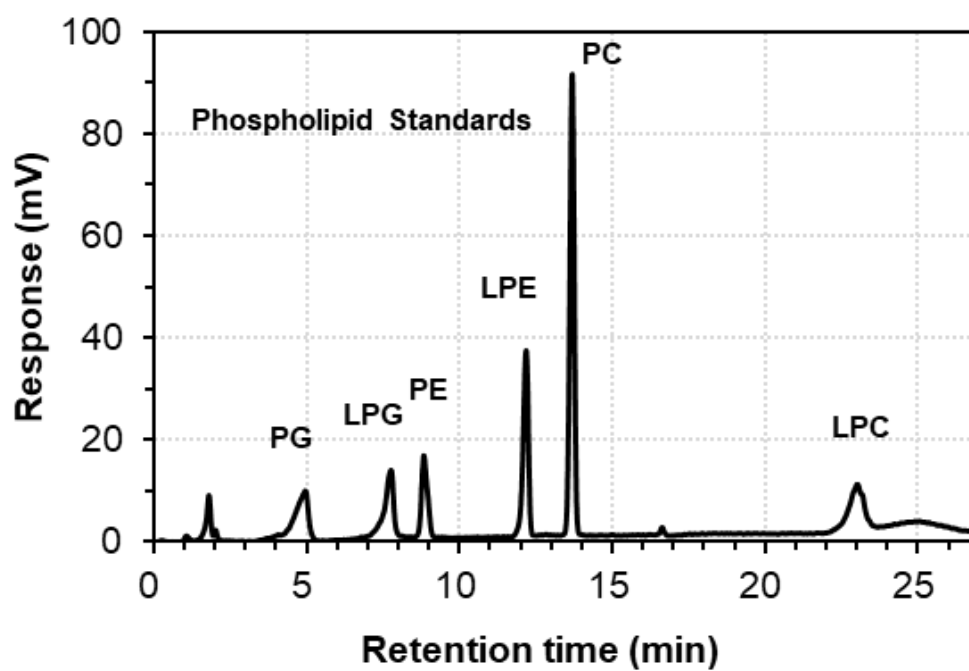

(b)

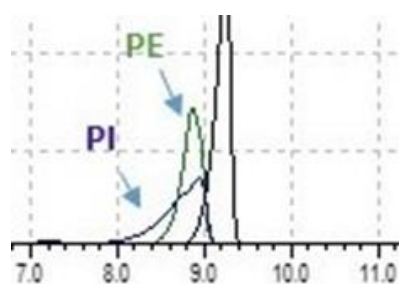

**Figure S1:** HPLC-ELSD chromatogram of phospholipid standards.

(a) Standards of PC(16:0/18:2), PE(16:0/18:2), PG(soy), LPC(18:1), LPE(18:1), and LPG(18:1); (b) Standards of PE(16:0/18:2) and PI(soy).

**Table S1.** Classes and proportions of phosphatidic acids in each sample (mol %).

| Mass  | PA       | Hevea         |               | TKS          |              |
|-------|----------|---------------|---------------|--------------|--------------|
|       |          | Latex         | WRP           | Latex        | WRP          |
| 666.5 | PA(32:0) | 3.63 ± 1.86   | 12.63 ± 10.22 | 0.00 ± 0.00  | 0.37 ± 0.43  |
| 688.5 | PA(34:3) | 9.53 ± 14.2   | 1.02 ± 1.77   | 8.52 ± 2.85  | 8.83 ± 4.23  |
| 690.5 | PA(34:2) | 13.54 ± 5.86  | 27.47 ± 13.49 | 63.10 ± 3.82 | 52.08 ± 4.11 |
| 692.5 | PA(34:1) | 5.63 ± 5.25   | 9.15 ± 4.78   | 5.13 ± 0.02  | 5.71 ± 2.04  |
| 712.5 | PA(36:5) | 2.49 ± 2.28   | 1.25 ± 2.17   | 5.23 ± 1.27  | 6.13 ± 0.69  |
| 714.5 | PA(36:4) | 33.51 ± 10.08 | 13.62 ± 8.87  | 15.77 ± 6.25 | 19.97 ± 3.16 |
| 716.5 | PA(36:3) | 13.39 ± 4.72  | 13.01 ± 12.02 | 1.80 ± 2.02  | 4.43 ± 1.22  |
| 718.5 | PA(36:2) | 18.03 ± 8.81  | 21.76 ± 10.85 | 0.46 ± 0.69  | 2.11 ± 2.21  |

\* The PA species of which the proportions were less than 1% were removed (PA 34:4, PA 34:5, PA 34:6, PA 36:6)

**Table S2.** Classes and proportions of phosphatidylglycerols in each sample (mol %).

| Mass  | PG       | Hevea         |               | TKS          |              |
|-------|----------|---------------|---------------|--------------|--------------|
|       |          | Latex         | WRP           | Latex        | WRP          |
| 762.5 | PG(34:3) | 4.73 ± 3.09   | 3.95 ± 6.84   | 6.66 ± 2.84  | 7.17 ± 3.63  |
| 764.5 | PG(34:2) | 55.78 ± 14.50 | 56.02 ± 7.58  | 91.69 ± 2.21 | 88.50 ± 5.97 |
| 766.5 | PG(34:1) | 13.81 ± 12.31 | 17.32 ± 2.61  | 0.06 ± 0.10  | 2.52 ± 2.65  |
| 768.5 | PG(34:0) | 2.11 ± 1.85   | 0.25 ± 0.43   | 0.01 ± 0.01  | 0.00 ± 0.00  |
| 786.5 | PG(36:5) | 1.51 ± 1.31   | 10.26 ± 17.76 | 0.31 ± 0.35  | 0.34 ± 0.30  |
| 788.5 | PG(36:4) | 4.35 ± 3.98   | 9.13 ± 12.73  | 0.51 ± 0.24  | 1.21 ± 0.92  |
| 790.5 | PG(36:3) | 10.08 ± 17.45 | 2.28 ± 2.02   | 0.00 ± 0.00  | 0.24 ± 0.22  |
| 792.5 | PG(36:2) | 6.79 ± 6.69   | 0.00 ± 0.00   | 0.00 ± 0.00  | 0.04 ± 0.07  |

\* The PG species of which the proportions were less than 1% were removed (PG 32:0, PG 32:1, PG 34:3, PG 36:1, PG 36:6)

**Table S3.** Classes and proportions of phosphatidylserines in each sample (mol %).

| Mass  | PS       | Hevea        |              | TKS          |              |
|-------|----------|--------------|--------------|--------------|--------------|
|       |          | Latex        | WRP          | Latex        | WRP          |
| 758.5 | PS(34:3) | 0.05 ± 0.09  | 0.00 ± 0.00  | 6.12 ± 2.65  | 5.18 ± 6.28  |
| 760.5 | PS(34:2) | 6.03 ± 0.73  | 3.08 ± 3.33  | 36.53 ± 8.63 | 28.17 ± 2.44 |
| 762.5 | PS(34:1) | 4.49 ± 1.86  | 2.64 ± 2.32  | 0.50 ± 0.23  | 1.32 ± 1.18  |
| 782.5 | PS(36:5) | 0.15 ± 0.27  | 0.00 ± 0.00  | 1.80 ± 0.76  | 1.49 ± 2.08  |
| 784.5 | PS(36:4) | 1.16 ± 0.79  | 0.48 ± 0.84  | 9.59 ± 3.44  | 13.46 ± 5.09 |
| 786.5 | PS(36:3) | 7.40 ± 3.14  | 8.69 ± 0.75  | 0.00 ± 0.00  | 2.67 ± 0.83  |
| 788.5 | PS(36:2) | 18.41 ± 3.05 | 26.69 ± 5.40 | 0.57 ± 0.98  | 2.92 ± 2.23  |
| 790.6 | PS(36:1) | 2.06 ± 2.24  | 1.42 ± 2.46  | 0.00 ± 0.00  | 0.00 ± 0.00  |
| 812.5 | PS(38:4) | 1.92 ± 1.04  | 0.94 ± 1.62  | 0.19 ± 0.18  | 0.24 ± 0.42  |
| 814.6 | PS(38:3) | 7.84 ± 1.30  | 6.25 ± 2.93  | 0.24 ± 0.42  | 3.04 ± 1.38  |
| 816.6 | PS(38:2) | 23.09 ± 2.19 | 31.66 ± 9.41 | 10.10 ± 4.97 | 10.02 ± 2.77 |
| 818.6 | PS(38:1) | 9.10 ± 4.32  | 9.50 ± 2.80  | 0.00 ± 0.00  | 3.07 ± 3.28  |
| 842.6 | PS(40:3) | 1.47 ± 1.31  | 0.51 ± 0.89  | 5.57 ± 2.35  | 4.43 ± 3.13  |
| 844.6 | PS(40:2) | 10.76 ± 1.82 | 4.76 ± 2.33  | 25.66 ± 7.35 | 18.84 ± 5.14 |
| 846.6 | PS(40:1) | 5.42 ± 1.14  | 3.16 ± 3.21  | 0.00 ± 0.00  | 2.12 ± 1.99  |
| 872.6 | PS(42:2) | 0.27 ± 0.47  | 0.00 ± 0.00  | 2.93 ± 3.65  | 2.67 ± 2.82  |

\* The PS species of which the proportions were less than 1% were removed (PS 34:4, PS 36:6, PS 38:5, PS 38:6, PS 40:4, PS 42:1, PS 42:3, PS 42:4, PS 44:2, PS 44:3)

**Table S4.** Classes and proportions of lysophosphatidylcholines in each sample (mol %).

| Mass  | LPC       | Hevea        |               | TKS          |              |
|-------|-----------|--------------|---------------|--------------|--------------|
|       |           | Latex        | WRP**         | Latex        | WRP          |
| 496.3 | LPC(16:0) | 5.27 ± 2.93  | 15.83 ± 13.12 | 24.82 ± 0.76 | 21.46 ± 2.64 |
| 518.3 | LPC(18:3) | 4.27 ± 0.42  | 4.34 ± 2.96   | 11.13 ± 3.61 | 12.3 ± 0.8   |
| 520.3 | LPC(18:2) | 57.89 ± 4.99 | 47.07 ± 9.66  | 58.38 ± 3.64 | 56.76 ± 3.38 |
| 522.3 | LPC(18:1) | 22.15 ± 3.15 | 20.61 ± 10.04 | 1.42 ± 2.46  | 7.71 ± 4.83  |
| 524.4 | LPC(18:0) | 10.02 ± 2.62 | 11.28 ± 3.31  | 4.25 ± 6.91  | 1.58 ± 1.5   |

\* The LPC species of which the proportion was less than 1% was removed (LPC 16:1)
